# Supplementary material for: Tunable Anticorrosive Effects of Newly Synthesized Benzothiazole Azo Dyes by Potassium Iodide Synergism for Carbon Steel in 1 M HCl: Combined Experimental and Theoretical Studies
Source: PubMed Central journal article supplement — ACS Omega. 2023 Jul 27;8(31):28314–32. doi: 10.1021/acsomega.3c02105 (PMC10413836; doi:10.1021/acsomega.3c02105), 2023-07-27
Supplement: ao3c02105_si_001.pdf [file ao3c02105_si_001.pdf]

# Supporting Information

## **Tunable Anticorrosive Effects of Newly Synthesized Benzothiazole Azo Dyes by Potassium Iodide Synergism for Carbon Steel in 1 M HCl: Combined Experimental and Theoretical Studies**

**Mahmoud M. Youssif<sup>1\*</sup>, Marwa N. El-Nahass<sup>1\*</sup>, Tarek A. Fayed<sup>1</sup>, Hosny A. El-Daly<sup>1</sup>, Mohammed M. El-Gamil<sup>2</sup>, Ahmed. M. Eldesoky<sup>3</sup>**

<sup>1</sup>Department of Chemistry, Faculty of Science, Tanta University, 31527 Tanta, Egypt

<sup>2</sup>Department of Toxic and Narcotic Drug, Forensic Medicine, Mansoura Laboratory, Medico legal Organization, Ministry of Justice, Egypt

<sup>3</sup>Chemical Engineering Department, High Institute of Engineering & Technology, New Damietta 34517, Egypt and Department of Chemistry, University College in Al-Qunfudhah 21912, Umm Al-Qura University, KSA

### **Correspondence**

Dr. Marwa N. El-Nahass and Mahmoud M. Youssif

Department of Chemistry, Faculty of Science, Tanta University, 31527, Tanta, Egypt.

Emails: [marwa.elnahas@science.tanta.edu.eg](mailto:marwa.elnahas@science.tanta.edu.eg); [mahmoudyoussif14@yahoo.com](mailto:mahmoudyoussif14@yahoo.com);  
[mahmoud.youssif@science.tanta.edu.eg](mailto:mahmoud.youssif@science.tanta.edu.eg)

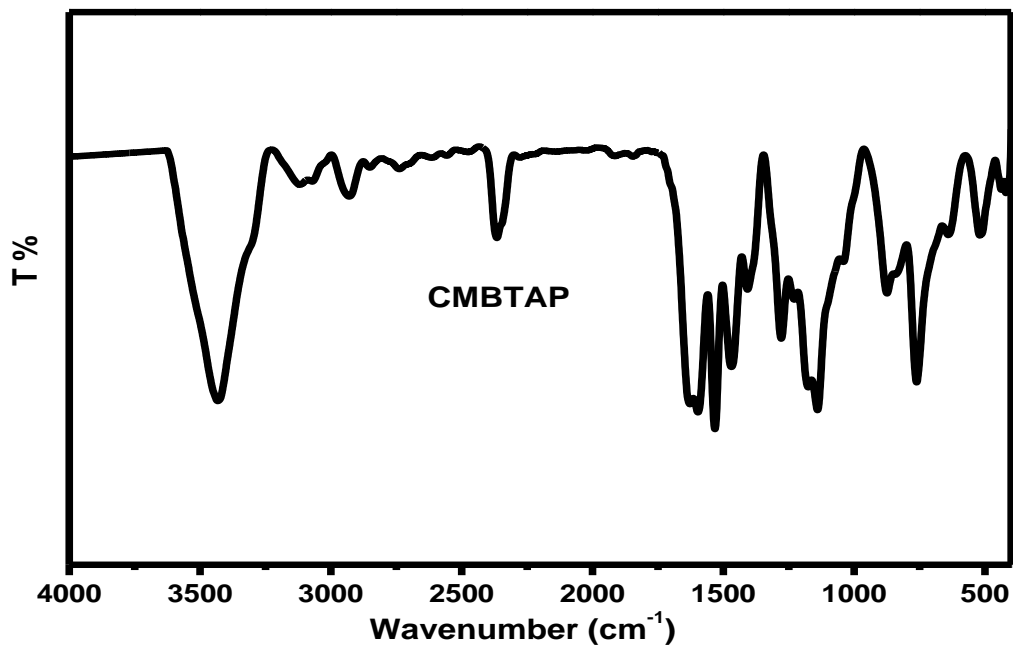

Figure S1. FT-IR spectra of the investigated CMPTAP.

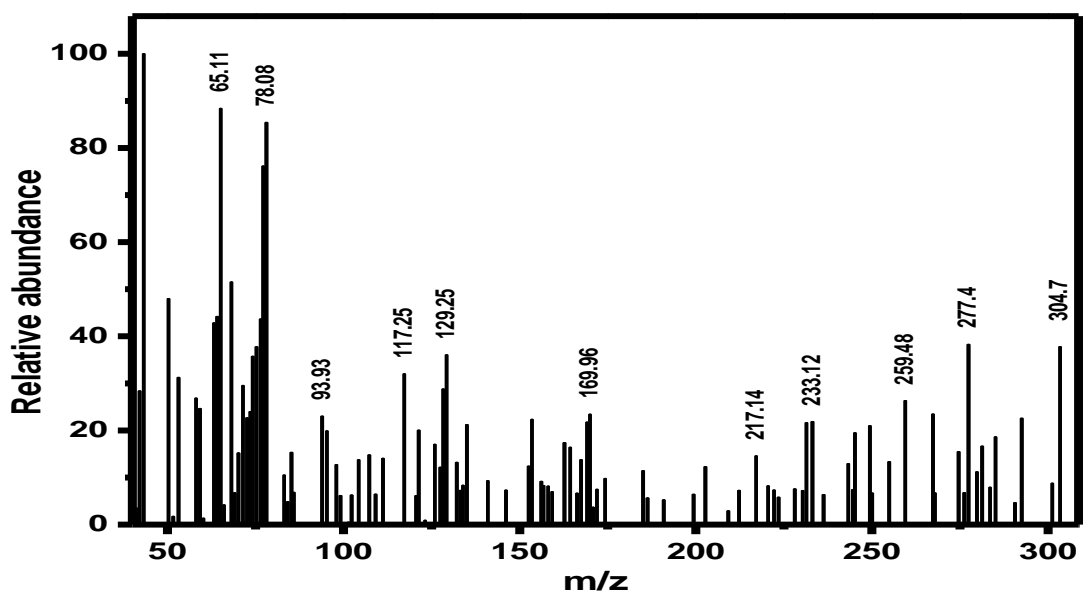

Figure S2. Mass spectrum of the investigated CMPTAP.

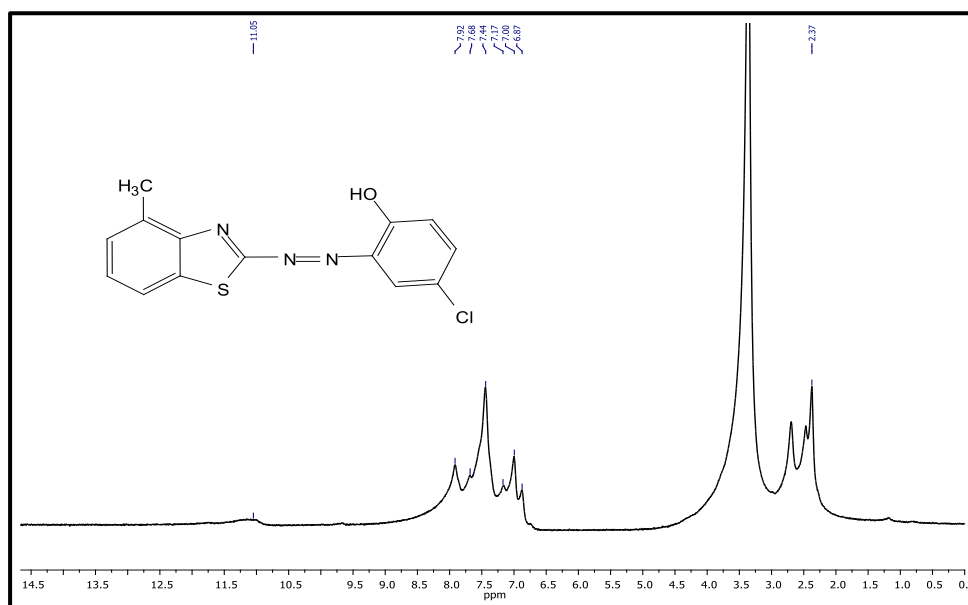

**Figure S3.** <sup>1</sup>H-NMR spectrum of the investigated CMPTAP in DMSO-d<sub>6</sub>.

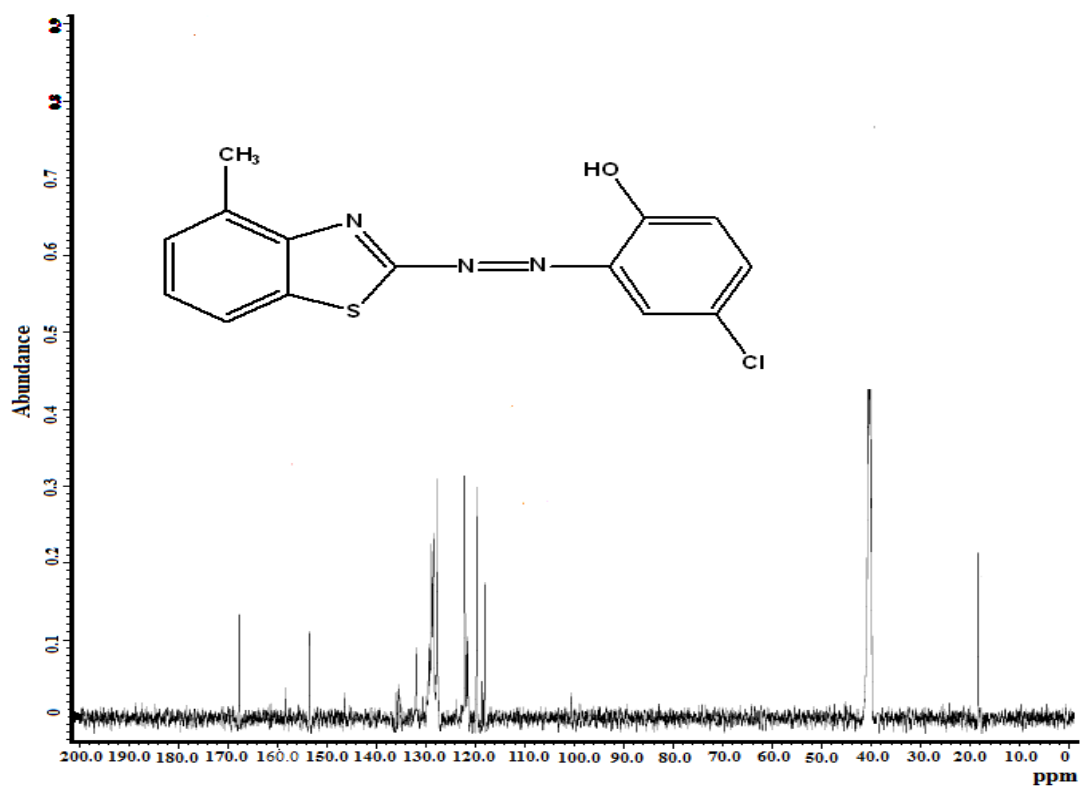

**Figure S4.** <sup>13</sup>C-NMR spectrum of the investigated CMPTAP in DMSO-d<sub>6</sub>.

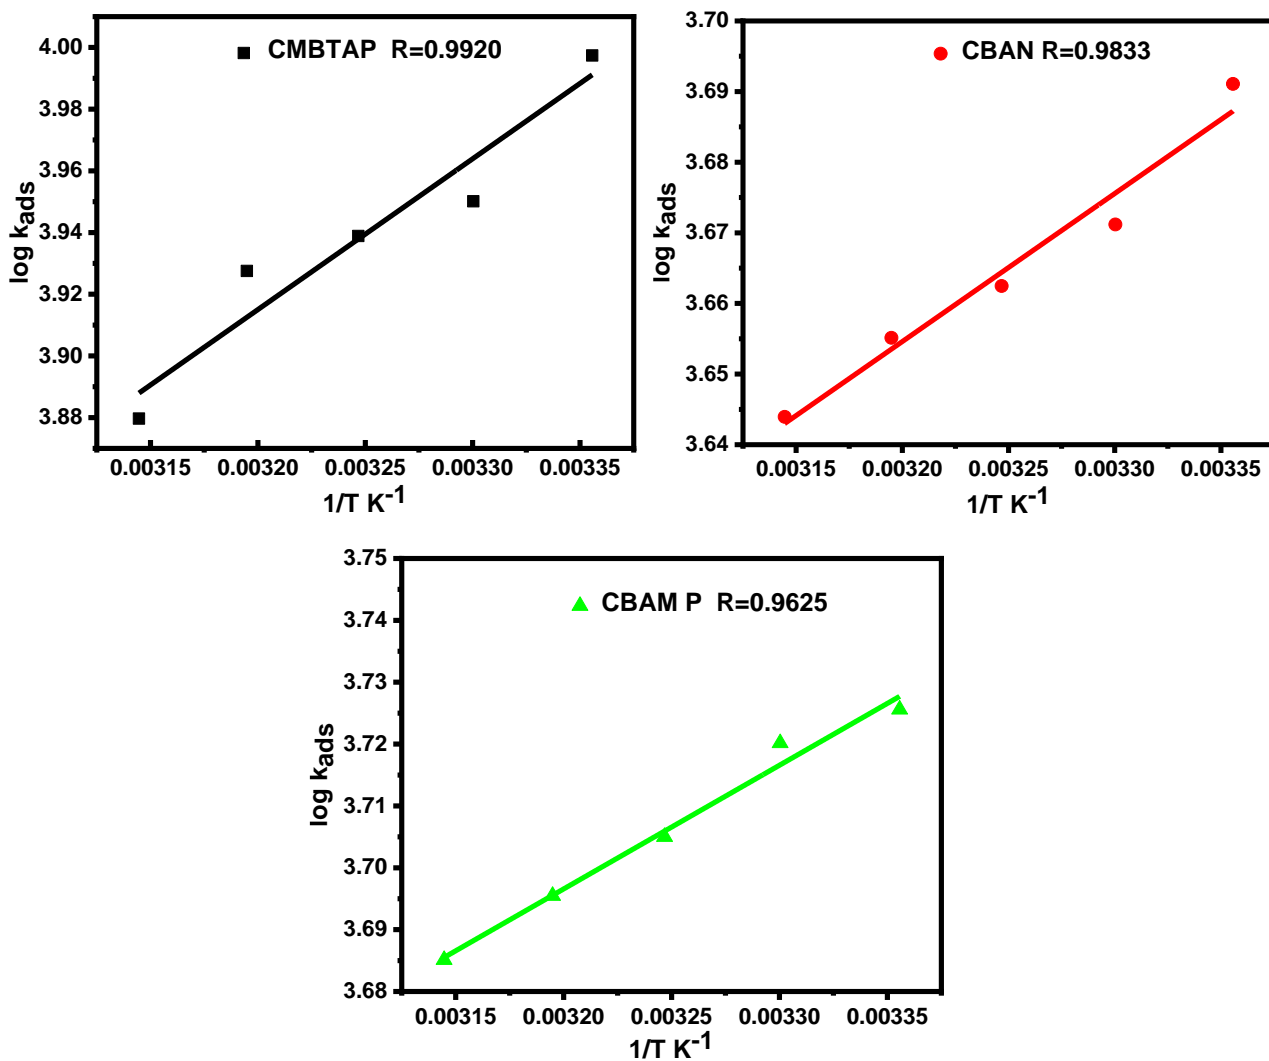

**Figure S5.** Log  $K_{ads}$  vs.  $(1/T)$  curves for carbon steel dissolution in 1.0 M HCl in the presence of CMBTAP, CBAN and CBAMP.

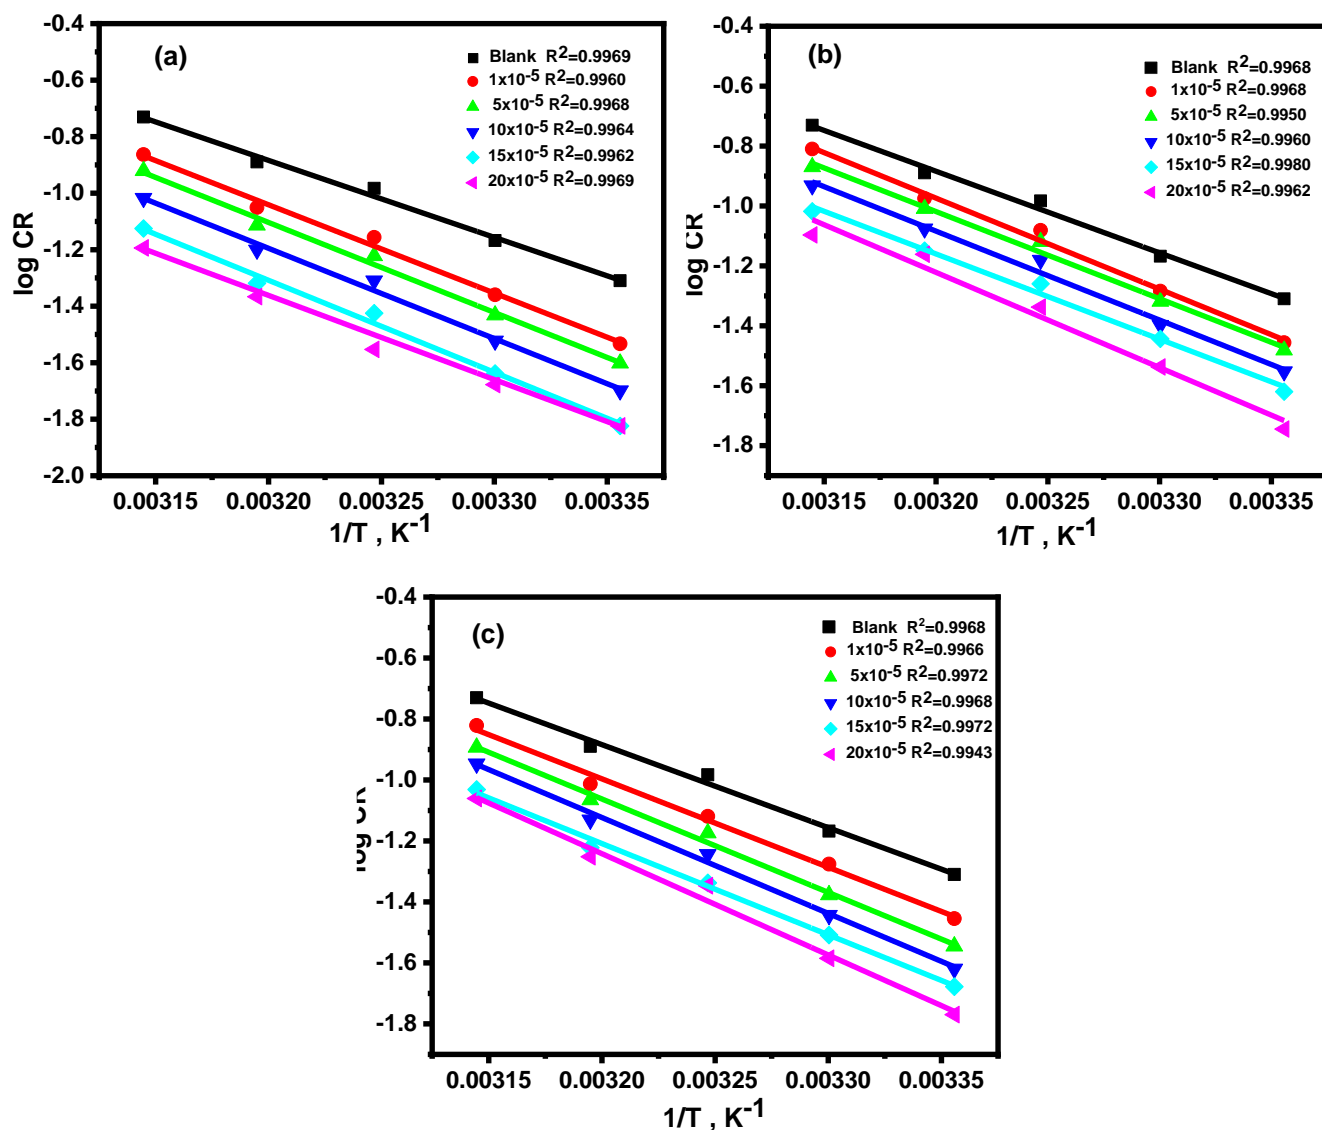

**Figure S6.** Arrhenius plots for carbon steel corrosion rates ( $k_{\text{corr}}$ ) after 120 minutes of immersion in 1.0 M HCl in the absence and presence of different concentrations of (a) CMBTAP, (b) CBAN and (c) CBAMP.

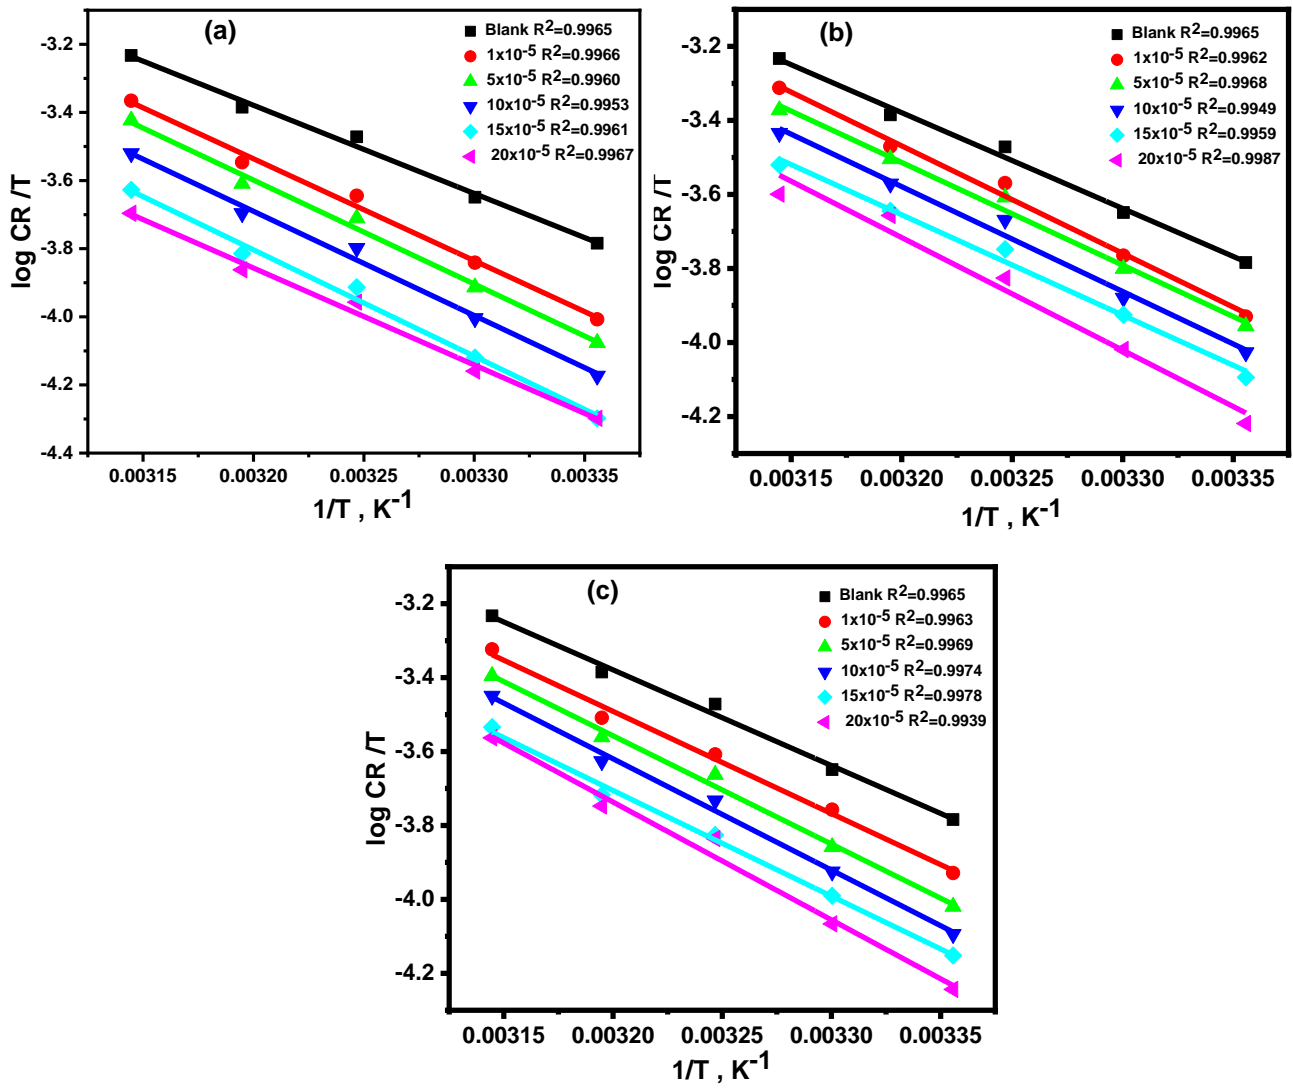

**Figure S7.** Plots of ( $\log k_{\text{corr}}$ ) vs.  $1/T$  for corrosion of C-steel in 1.0 M HCl in the absence and presence of different concentrations of (a) CMBTAP, (b) CBAN and (c) CBAMP.

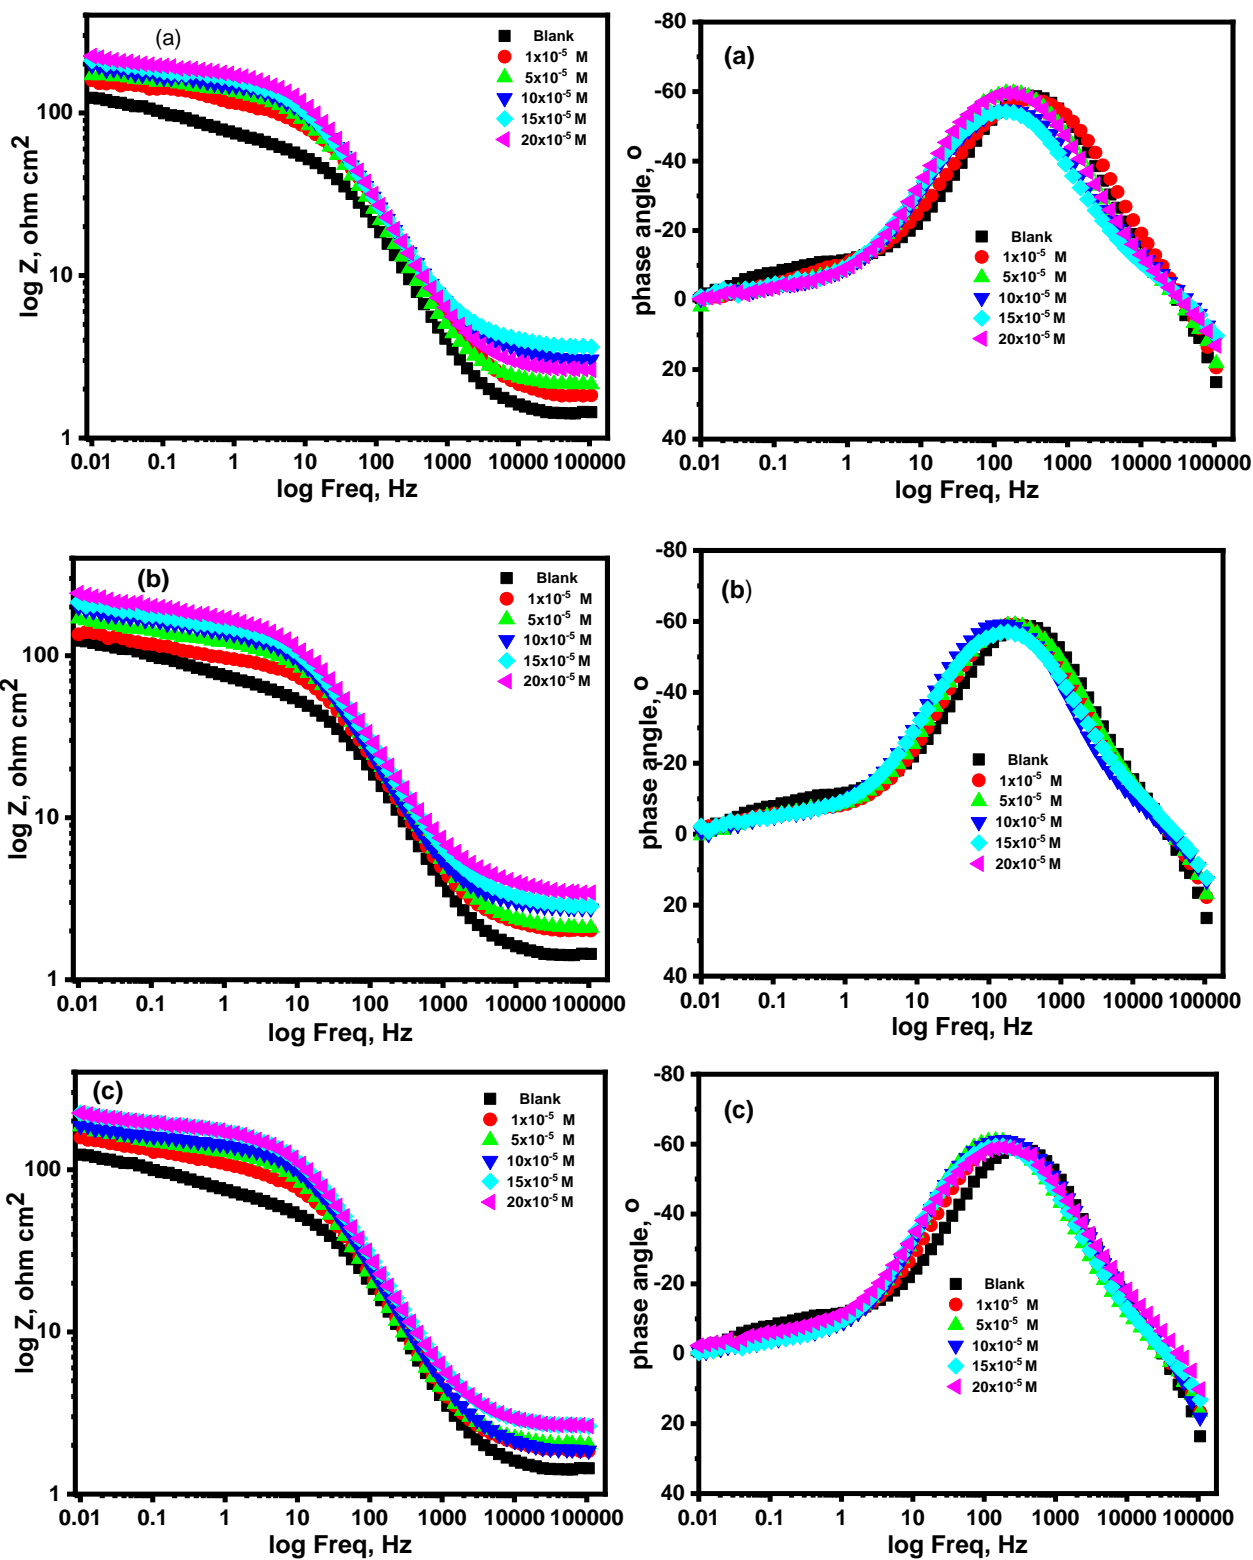

**Figure S8.** The Bode plots for corrosion of C-steel in 1.0 M HCl in the absence and presence of different concentrations of (a) CMBTAP, (b) CBAN and (c) CBAMP at 25°C.

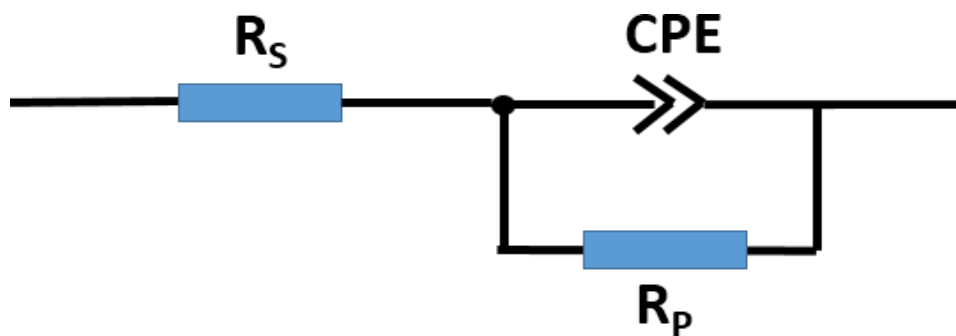

**Figure S9.** Equivalent circuit model used to fit experimental EIS.

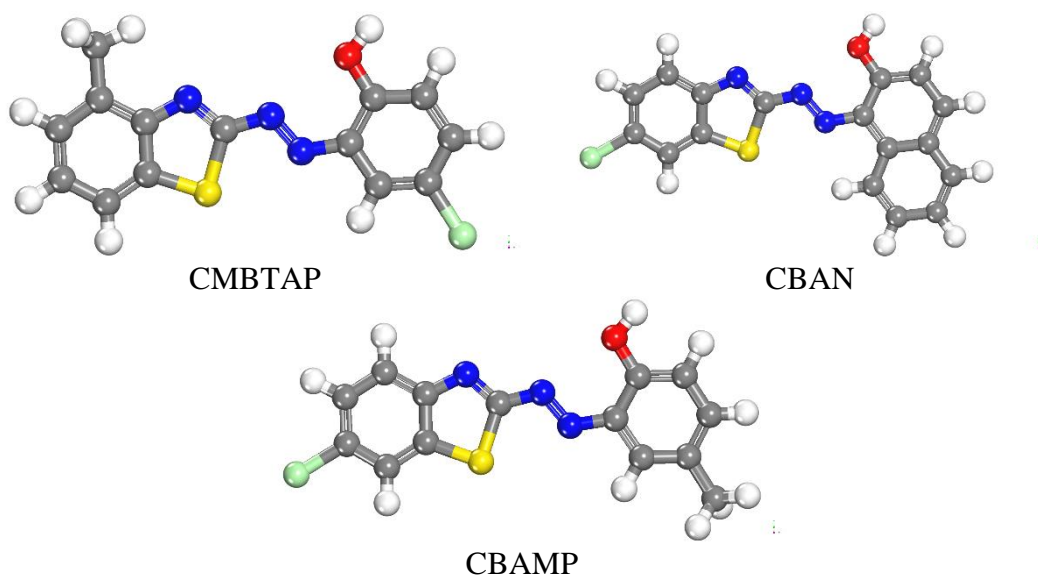

**Figure S10.** The optimized molecular structures of the investigated benzothiazole dyes.



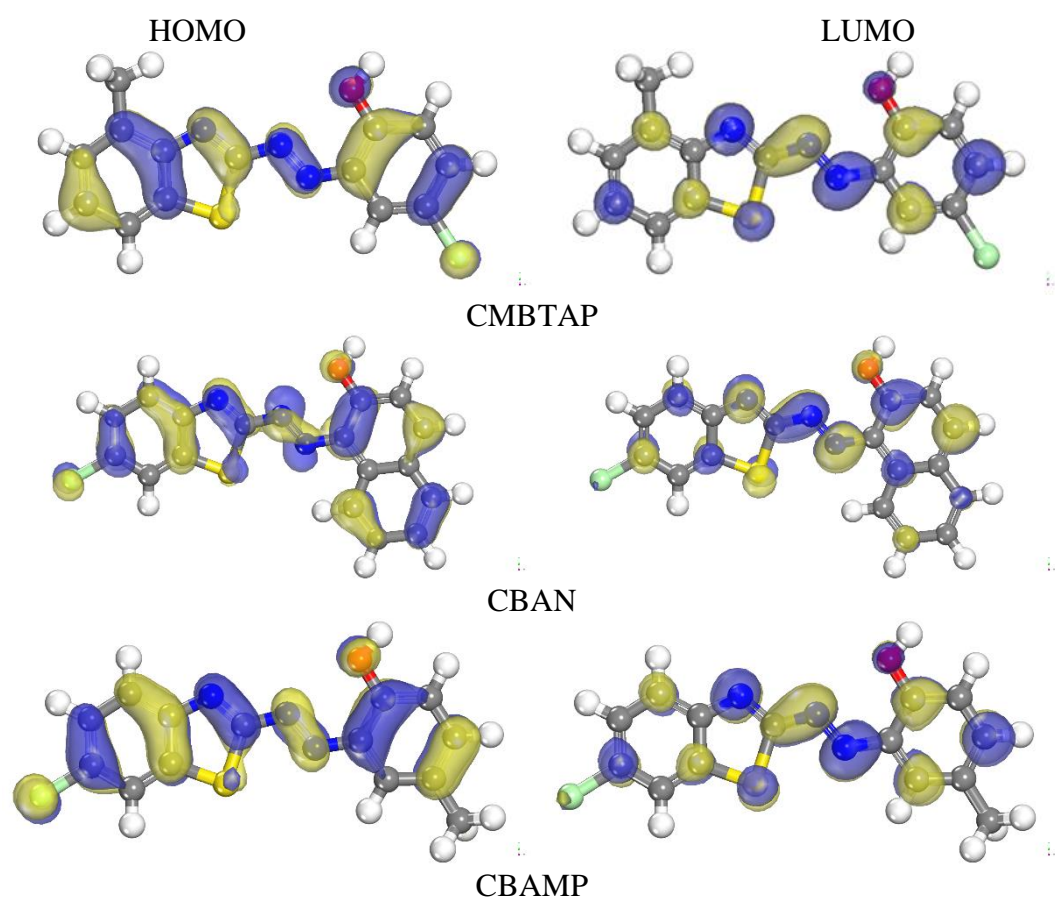

**Figure S11.** The highest occupied molecular orbital and the lowest unoccupied molecular orbital of the investigated benzothiazole dyes.

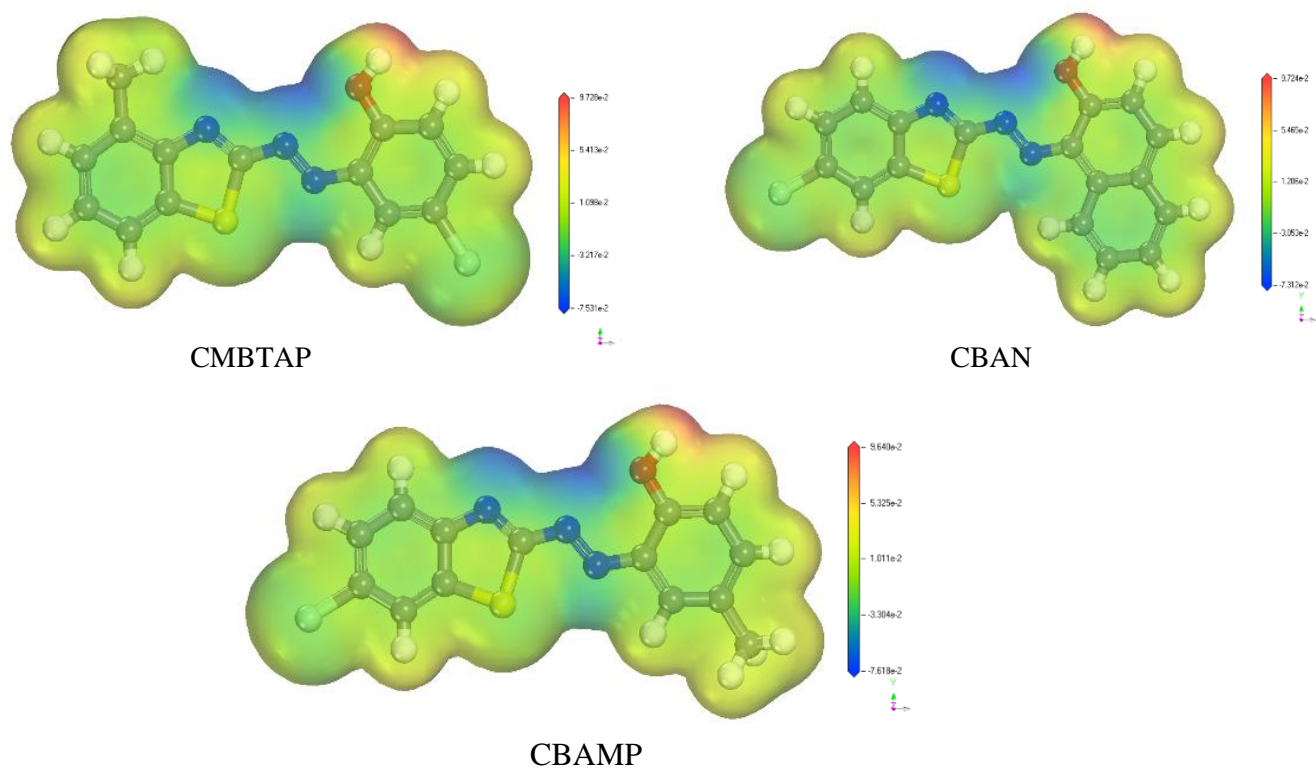

**Figure S12.** The molecular electrostatic potentials of optimized structures of the investigated benzothiazole dyes.

**Table S1.** Synergism Parameter ( $S_{\theta}$ ) at Different Concentrations of Inhibitors

| <b>Inhibitor</b> | <b>Synergism parameter (<math>S_{\theta}</math>)</b> |                  |                     |
|------------------|------------------------------------------------------|------------------|---------------------|
|                  | <b>Conc. x <math>10^{-5}</math> M</b>                | <b>Impedance</b> | <b>Polarization</b> |
| <b>CMBTAP</b>    | 1                                                    | 2.57             | 2.62                |
|                  | 5                                                    | 2.56             | 3.04                |
|                  | 10                                                   | 2.57             | 3.01                |
|                  | 15                                                   | 2.61             | 2.85                |
|                  | 20                                                   | 3.23             | 3.66                |
| <b>CBAN</b>      | 1                                                    | 1.86             | 1.83                |
|                  | 5                                                    | 2.10             | 1.75                |
|                  | 10                                                   | 2.17             | 2.26                |
|                  | 15                                                   | 2.16             | 2.04                |
|                  | 20                                                   | 2.13             | 1.91                |
| <b>CBAMP</b>     | 1                                                    | 2.33             | 2.51                |
|                  | 5                                                    | 2.53             | 2.75                |
|                  | 10                                                   | 2.61             | 2.87                |
|                  | 15                                                   | 2.78             | 2.86                |
|                  | 20                                                   | 2.77             | 2.92                |

**Table S2.** Outputs and Descriptors Calculated by the Monte Carlo Simulation for Adsorption of the Inhibitors on Fe (110) Surface

| Compound  | Total energy (Kcal/mol) | Adsorption energy (Kcal/mol) | Rigid adsorption energy (Kcal/mol) | Deformation energy (Kcal/mol) | Dye: dEad/dNi | HCl: dEad/dNi | H <sub>2</sub> O : dEad/dNi | H <sub>3</sub> O: dEad/dNi | Γ: dEad/dNi |
|-----------|-------------------------|------------------------------|------------------------------------|-------------------------------|---------------|---------------|-----------------------------|----------------------------|-------------|
| Γ         | -5635.13                | -13517.17                    | -5932.79                           | -7584.38                      | ---           | -8.02         | -33.14                      | -169.42                    | -136.96     |
| CMBTAP    | -5634.88                | -13549.25                    | -5939.32                           | -7609.94                      | -212.72       | -7.27         | -33.80                      | -171.42                    | ---         |
| CMBTAP+ Γ | -5722.39                | -13636.76                    | -6024.99                           | -7611.77                      | -222.74       | -5.79         | -32.93                      | -165.21                    | -131.47     |
| CBAN      | -5441.95                | -13469.77                    | -5858.18                           | -7611.59                      | -90.20        | -8.02         | -32.59                      | -167.65                    | ---         |
| CBAN+ Γ   | -5558.84                | -13566.66                    | -5961.02                           | -7605.65                      | -142.25       | -7.87         | -32.60                      | -167.47                    | -131.46     |
| CBAMP     | -5580.61                | -13482.65                    | -5876.28                           | -7606.38                      | -113.76       | -7.14         | -32.85                      | -166.86                    | ---         |
| CBAMP+ Γ  | -5669.22                | -13571.26                    | -5962.74                           | -7608.53                      | -160.30       | -8.82         | -33.09                      | -163.53                    | -131.57     |
